# Supplementary material for: Activin enhances skin tumourigenesis and malignant progression by inducing a pro-tumourigenic immune cell response
Source: PubMed Central journal article supplement — Nat Commun. 2011 Dec 6;2:576–. doi: 10.1038/ncomms1585 (PMC3247817; doi:10.1038/ncomms1585), 2011-12-06
Supplement: ncomms1585-s1.pdf [file ncomms1585-s1.pdf]

**Activin enhances skin tumorigenesis and malignant progression  
by inducing a pro-tumorigenic immune cell response**

Maria Antsiferova, Marcel Huber<sup>#</sup>, Michael Meyer<sup>#</sup>, Aleksandra Piwko-Czuchra<sup>#</sup>,  
Tamara Ramadan, Amanda S. MacLeod, Wendy L. Havran,  
Reinhard Dummer, Daniel Hohl, and  
Sabine Werner\*

<sup>#</sup>Equal contribution

\*Corresponding author

**Supplementary Information**

## Supplementary Figures

### Supplementary Figure S1: Increased activin A levels in skin and serum of activin-overexpressing mice and effect of high activin levels on TGF- $\beta$ responsiveness of keratinocytes

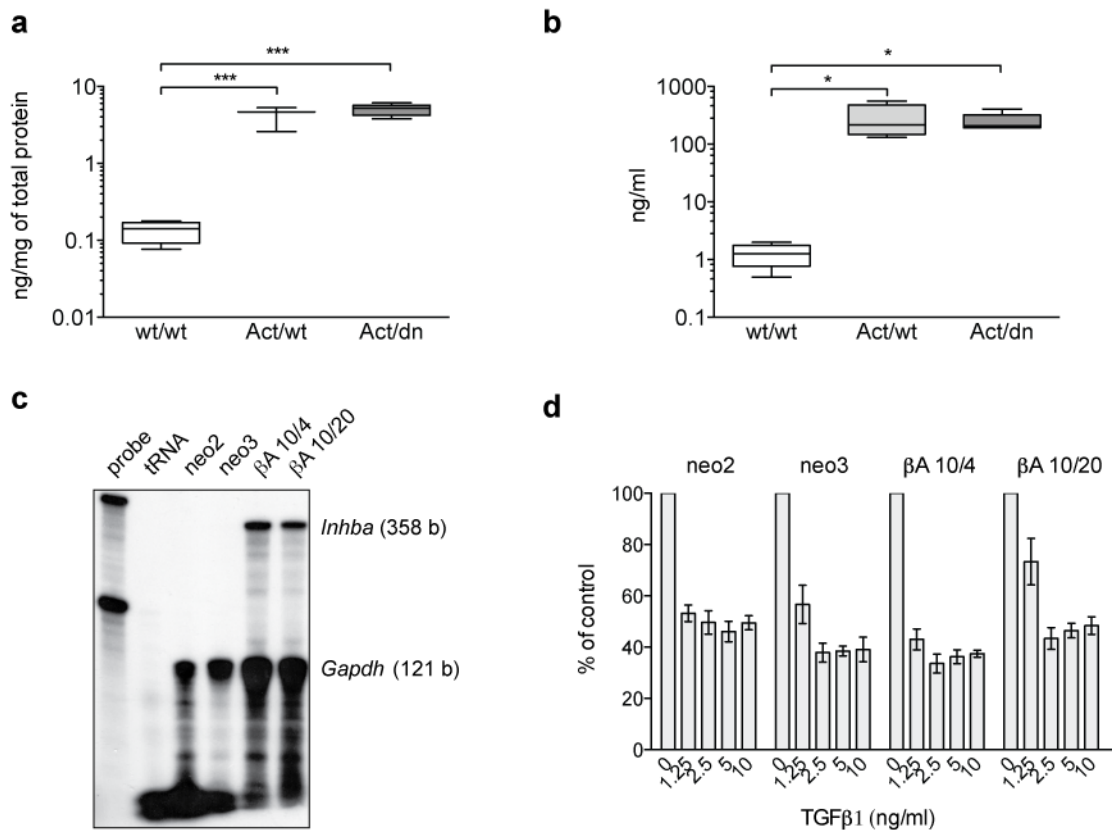

(a, b) Activin A concentrations in total skin lysates (a) and serum (b) from wt, Act and Act/dnActRIB mice were analyzed by ELISA. N=4-6 per genotype. Mean values  $\pm$  SD are shown. \* $p$ <0.05; \*\*\* $p$ <0.001 (one-way ANOVA with Bonferroni post-test). (c) RNA samples (20  $\mu$ g) from HaCaT keratinocytes stably expressing activin A ( $\beta$ A 10/4,  $\beta$ A 10/20 clones) or transfected with a control vector (neo2, neo3) were analyzed by RNase protection assay to verify the overexpression of activin  $\beta$ A (*Inhba*) in the 10/4 and 10/20 clones. One thousand c.p.m. of the hybridization probes served as size markers (probe). tRNA (10  $\mu$ g) was used as a negative control. Hybridization of RNA with a *Gapdh* riboprobe served as a loading control. (d) Activin  $\beta$ A transfected HaCaT keratinocytes and vector-transfected control clones were cultured for 48h in the presence of various

concentrations of TGF- $\beta$ 1, and BrdU incorporation was analyzed. The experiment was performed twice with 5 ng/ml TGF- $\beta$ 1 and once with the range of concentrations presented. Data are depicted as percentage of BrdU incorporation in untreated cells, the assay was performed in quadruplicates, mean values  $\pm$  SD are shown.

**Supplementary Figure S2: Activin overexpression does not significantly affect keratinocyte proliferation in DMBA/TPA-induced tumors or treated skin or expression of cytokines and DMBA-detoxifying enzymes**

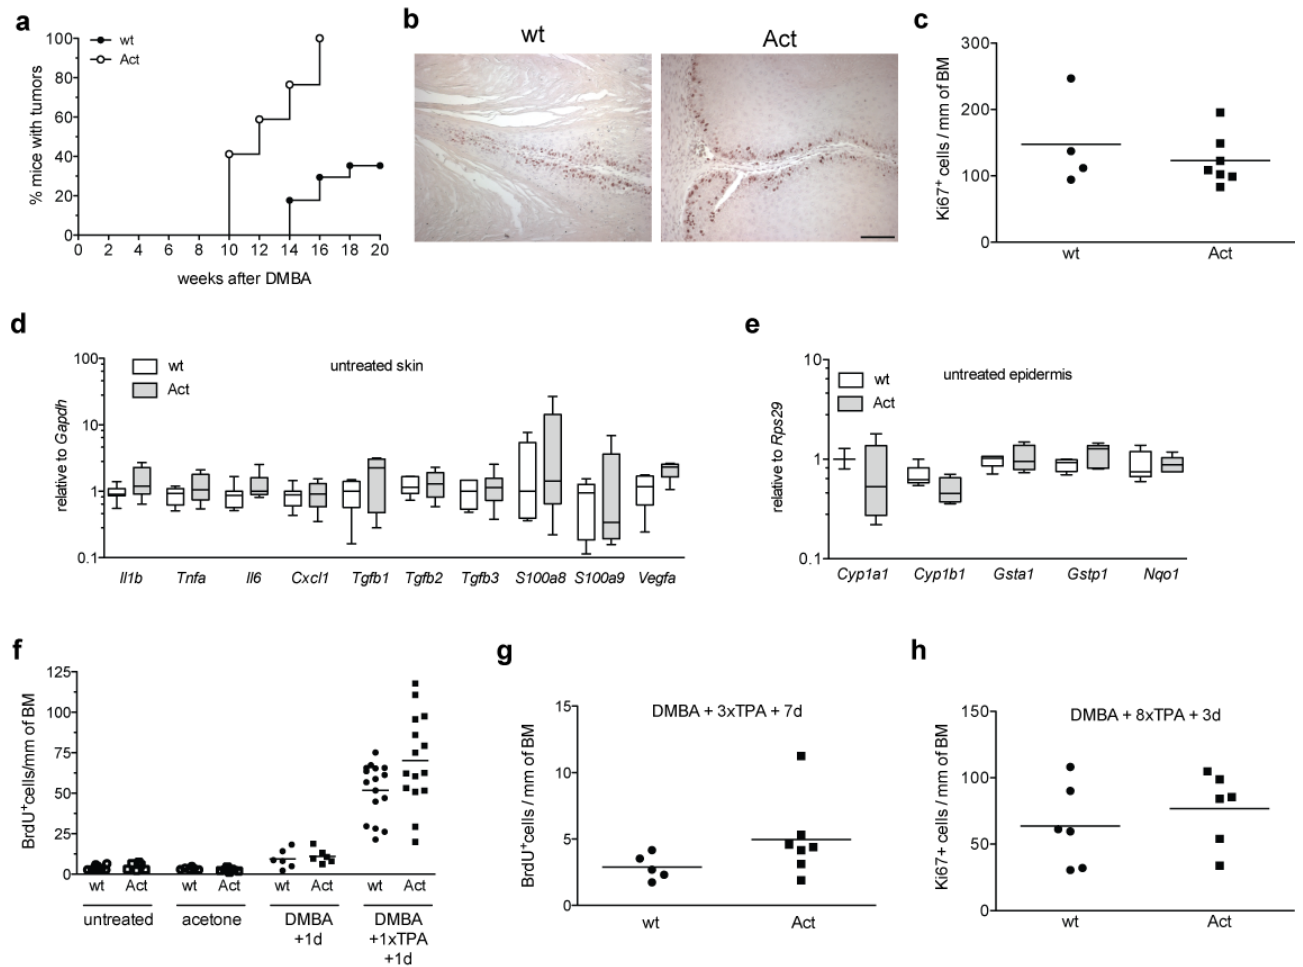

(a) Kinetics of tumor incidence observed in experiment II. Kaplan-Meier survival curves. N=17 mice per genotype. (b,c) Sections of tumors collected 20 weeks after DMBA initiation were stained with antibodies against Ki67. (b) Representative pictures. (c) Ki67<sup>+</sup> cells per mm of basement membrane (BM). N=4 wt mice; N=7 Act mice; n=2-5 microscopic fields of sections per mouse; mean values  $\pm$  SD are shown. (d, e) RNA samples from untreated total back skin (d) or trypsin-separated epidermis (e) were analyzed for expression of pro-inflammatory cytokines/chemokines and growth factors (d) or enzymes involved in DMBA metabolism (e) by qRT-PCR. *Gapdh* (d) or ribosomal protein S29 (*Rps29*) (e) were used as reference. N=5-10 mice per genotype. For each gene expression in one of the wt mice was arbitrarily set to 1. Box-and-whisker plot is depicted, with boxes showing median and 25<sup>th</sup> and 75<sup>th</sup> percentile, whiskers showing minimal and maximal values. (f, g) BrdU incorporation assay was performed at different

time points after acetone, DMBA or DMBA/TPA treatment and the number of epidermal BrdU<sup>+</sup> cells per mm of basement membrane (BM) was counted. Mean values  $\pm$  SD are shown; n=6-41 microscopic fields of skin sections per mouse. N=6-16 mice per group (f) or N=5 wt mice; N=7 Act mice (g). (h) Sections from back skin collected 3 days after the 8<sup>th</sup> TPA application were stained with antibodies against Ki67, and positive cells per mm of BM were counted. N=5 wt mice; N=7 Act mice; n=3-30 microscopic fields of skin sections per mouse; mean values  $\pm$  SD are shown.

## Supplementary Figure S3: Activin overexpression does not affect inflammation or angiogenesis

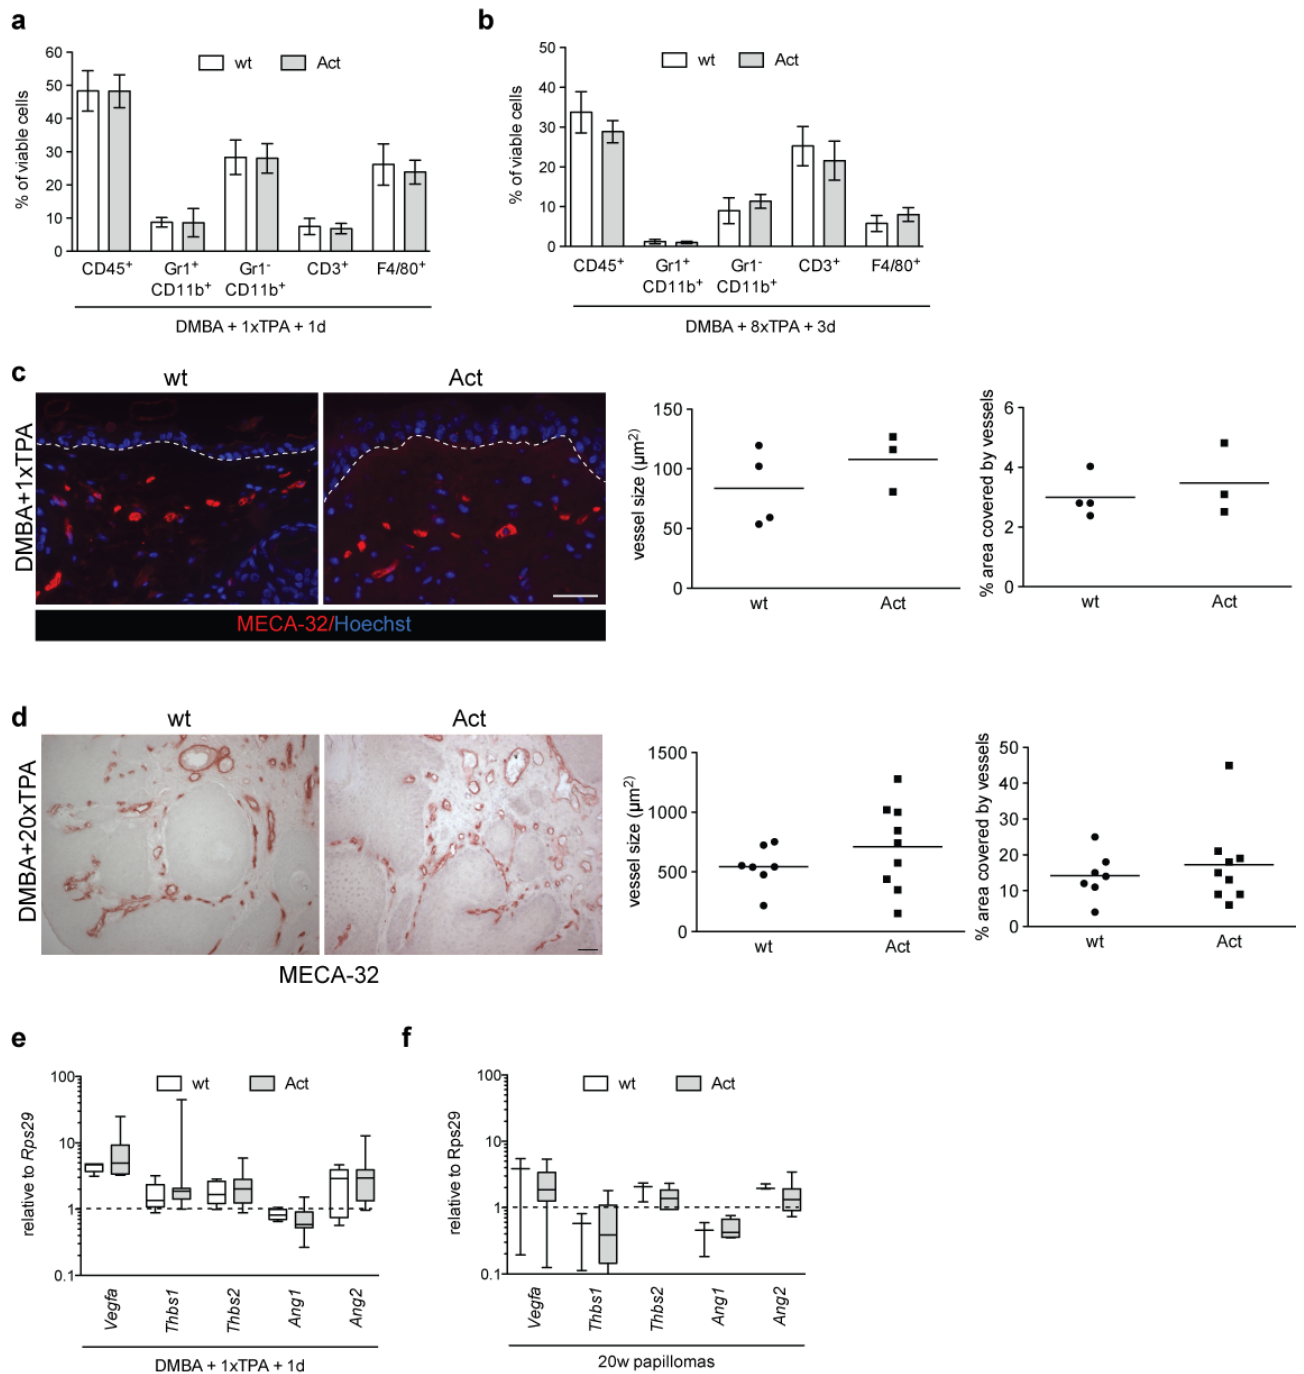

(a, b) Flow cytometric analysis of dermal single cell suspensions prepared from the skin of wt and Act mice 1 day after the 1<sup>st</sup> (a) or 3 days after the 8<sup>th</sup> (b) TPA treatment. The mean percentages of the respective immune cells among viable cells  $\pm$  SD are shown; N=3-7 mice per genotype. (c, d) Sections of skin collected 1 day after the 1<sup>st</sup> TPA application (c) or of papillomas collected 20 weeks after initiation (d) were stained with antibodies against MECA-32 to visualize blood vessels and analyzed using

immunofluorescence (c) or immunohistochemistry (d). Size of blood vessels (left) and area of dermis covered by blood vessels (right) were determined. Scatter plot and mean values are shown; N=3-9 mice per genotype. (e, f) RNA samples from TPA-treated back skin (e) or from papillomas collected 20 weeks after initiation (f) were analyzed for expression of angiogenesis-regulating factors by qRT-PCR. *Rps29* was used as reference. N=3-10 mice per genotype. For each gene expression in one of the untreated wt mice was arbitrarily set to 1 (represented by dotted line).

**Supplementary Figure S4: Chronic TPA treatment irreversibly depletes  $V\gamma 3^+$  T cells and attracts  $V\gamma 2^+$  T cells to the epidermis of activin overexpressing mice**

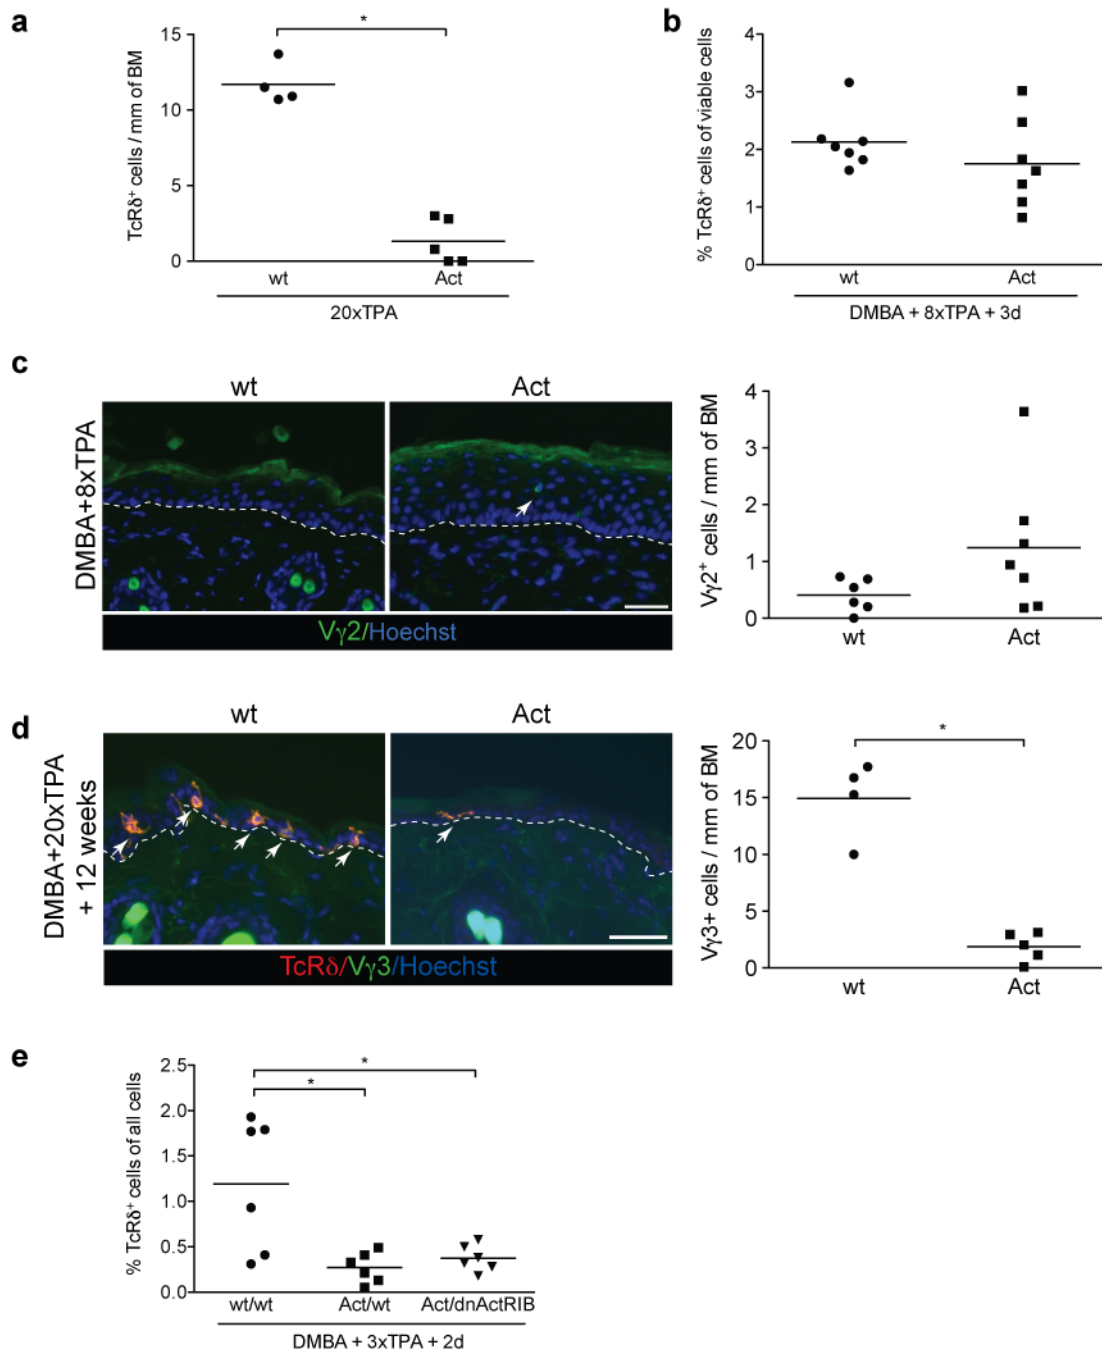

(a) TcR $\delta$  positive cells in the back skin epidermis of mice treated with TPA only for 20 weeks. N=4 wt mice; N=5 Act mice; n=9-22 microscopic fields of skin sections per mouse; \*p=0.0159 (Mann-Whitney test). (b) Viable TcR $\delta^+$  cells quantified by flow cytometry in dermal single cell suspensions 3 days after the 8<sup>th</sup> TPA application. N=7 mice per group. (c) Sections from non-tumorigenic skin after the 8th TPA treatment stained for the  $V\gamma 2$  variant of  $\gamma\delta$  TcR. Arrows indicate  $V\gamma 2^+$  cells.  $V\gamma 2^+$  cells per mm of BM were



counted. N=6 wt mice; N=7 Act mice; n=3-13 microscopic fields of skin sections per mouse. (d) Sections from non-tumorigenic skin 32 weeks after initiation (12 weeks after 20<sup>th</sup> TPA application) co-stained for the  $\delta$ -chain of  $\gamma\delta$  TcR (TcR $\delta$ ) and the V $\gamma$ 3 variant of  $\gamma\delta$  TcR. V $\gamma$ 3<sup>+</sup> cells per mm of BM were counted (all V $\gamma$ 3<sup>+</sup> cells co-expressed  $\delta$ TcR). N=4 wt mice; N=5 Act mice; n=6-36 microscopic fields of skin sections per mouse; \*p=0.0159 (Mann-Whitney test). In (c) and (d) nuclei were counterstained with Hoechst; dotted line indicates the epidermal-dermal border. (e) Viable TcR $\delta$ <sup>+</sup> cells quantified by flow cytometry in epidermal single cell suspensions prepared from skin 2 days after the 3<sup>rd</sup> TPA application. N=6 mice per genotype, \*p $\leq$ 0.05 (one-way ANOVA with Bonferroni post-test). Scatter plot and mean values are shown in all panels.

**Supplementary Figure S5: Activin overexpression selectively affects epidermal T cells**

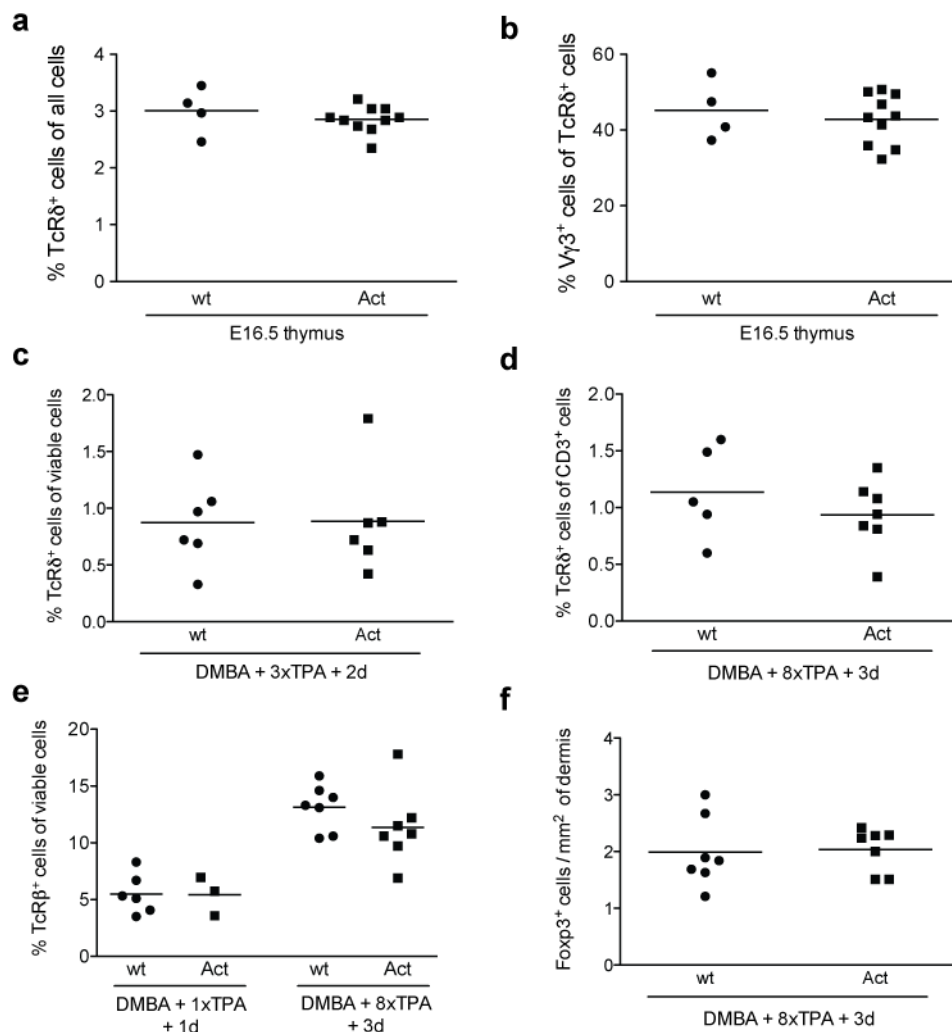

(a, b) Thymocytes were isolated from wt or Act mice at embryonic day 16.5 and analyzed by flow cytometry. The percentage of TcR $\delta^+$  cells among all cells (a) and proportion of V $\gamma$ 3 $^+$  cells among all  $\gamma\delta$  T cells (b) are shown. N=4 wt mice; N=10 Act mice. (c, d) Axillary lymph nodes were collected after the 3<sup>rd</sup> (c) or 8<sup>th</sup> (d) TPA application, and dissociated cells were analyzed by flow cytometry. The percentage of TcR $\delta^+$  cells among live cells (c) or among CD3 $^+$  cells (d) is shown. N=5-6 mice per genotype. (e) Viable TcR $\beta^+$  cells quantified by flow cytometry in dermal single cell suspensions 1 day after the 1<sup>st</sup> or 3 days after the 8<sup>th</sup> TPA application. N=3-7 mice per group. (f) Dermal FoxP3 $^+$  cells were counted in immunostained sections from back skin 3 days after the 8<sup>th</sup> TPA application. N=7 mice per genotype; n=6-25 microscopic fields of skin sections per mouse. Scatter plot and mean values are shown in all panels.

**Supplementary Figure S6: Activin overexpression does not affect activation of Langerhans cells after long-term TPA treatment**

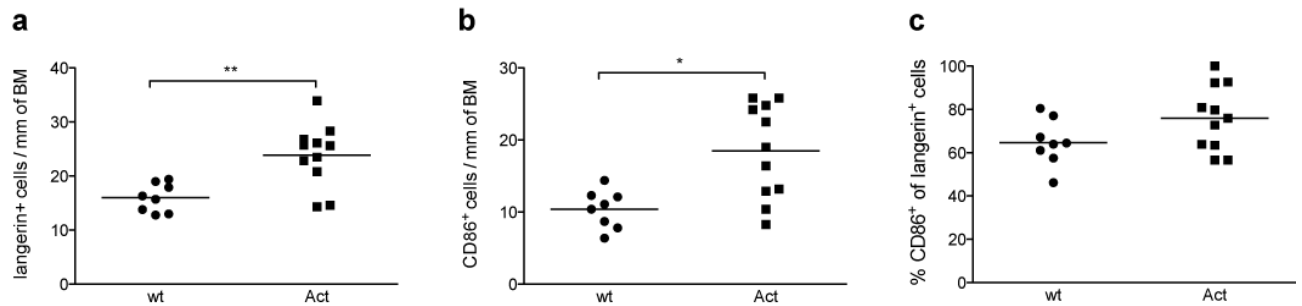

Serial sections of non-tumorigenic back skin after 20 TPA applications were stained with antibodies against langerin or the activation marker CD86. (a) Langerin<sup>+</sup> cells / mm of basement membrane (BM) (b) CD86<sup>+</sup> cells / mm of BM. (c) Estimated percentage of CD86<sup>+</sup> cells out of langerin<sup>+</sup> cells. N=8 wt mice, N=11 Act mice, n=9-21 microscopic fields of skin sections per mouse. \*\*p=0.0057; \*p=0.0104 (Mann-Whitney test). Scatter plot and mean values are shown.

**Supplementary Figure S7: Activin is overexpressed in skin papillomas of wild-type mice**

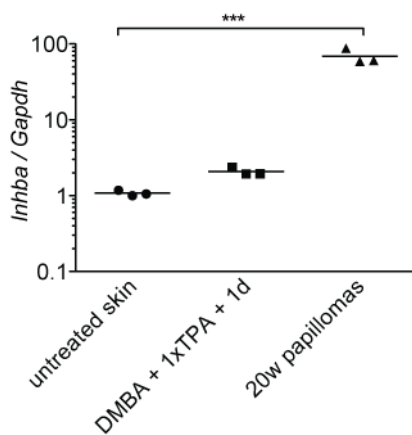

RNA samples from untreated or TPA-treated back skin and from papillomas collected 20 weeks after initiation were analyzed for expression of activin  $\beta$ A (*Inhba*) by qRT-PCR. *Gapdh* was used as a reference. Expression in one of the untreated wt mice was arbitrarily set to 1. N=3. \*\*\*p=0.0002 (one-way ANOVA with Bonferroni post-test).

## Supplementary Tables

**Supplementary Table S1: Antibodies and reagents used for immunostaining**

| <i>Name</i>                                 | <i>Catalog number</i> | <i>Source</i>                           |
|---------------------------------------------|-----------------------|-----------------------------------------|
| BrdU-FITC                                   | 1 202 693             | Roche                                   |
| BrdU-POD                                    | 1 585 860             | Roche                                   |
| <i>Primary antibodies to human antigens</i> |                       |                                         |
| Activin $\beta$ A                           | AF338                 | R&D Systems, Minneapolis, MN            |
| Pan-cytokeratin (C11)                       | ab7753                | Abcam, Cambridge, UK                    |
| <i>Primary antibodies to mouse antigens</i> |                       |                                         |
| $\gamma\delta$ TcR-FITC                     | 553177                | BD Biosciences, San Diego, CA           |
| $\gamma\delta$ TcR-biotin                   | 13-5711               | eBioscience, San Diego, CA              |
| CD3                                         | A0452                 | DAKO, Glostrup, Denmark                 |
| CD4-FITC                                    | 11-0041               | eBioscience                             |
| CD68                                        | MCA1957B              | Serotec, Düsseldorf, Germany            |
| CD86                                        | 550542                | BD Biosciences                          |
| CD8-PE                                      | 12-0081               | eBioscience                             |
| Cleaved caspase-3                           | 9661                  | Cell Signaling, Beverly, MA             |
| Keratin 10                                  | PRB-159P              | Covance, Princeton, New York            |
| Keratin 13                                  | K13.2                 | Lutz Langbein, DKFZ Heidelberg, Germany |
| Keratin 14                                  | PRB-155P              | Covance                                 |
| Keratin 6                                   | PRB-169P              | Covance                                 |
| Ki67                                        | M7249                 | DAKO                                    |
| Langerin                                    | -                     | Nikolaus Romani, Innsbruck Austria      |
| Ly6G                                        | 551459                | BD Biosciences                          |
| MECA-32                                     | 553849                | BD Biosciences                          |
| Pan-keratin                                 | GP14                  | Progen, Heidelberg, Germany             |
| TcR $\beta$                                 | 14-5961               | eBioscience                             |
| Vimentin                                    | GP53                  | Progen                                  |
| V $\gamma$ 2 TcR-FITC                       | 553226                | BD Biosciences                          |
| V $\gamma$ 3 TcR-FITC                       | 553229                | BD Biosciences                          |

| <i>Secondary antibodies and staining reagents</i> |             |                                        |
|---------------------------------------------------|-------------|----------------------------------------|
| Anti-armenian hamster-IgG-Cy2                     | 127-225-160 | Jackson Immunoresearch, West Grove, PA |
| Anti-armenian hamster-Cy3                         | 127-165-160 | Jackson Immunoresearch                 |
| Anti-guinea pig-IgG-biotin                        | BA-7000     | Vector Laboratories                    |
| Anti-guinea pig-IgG-Cy2                           | 106-225-003 | Jackson Immunoresearch                 |
| Anti-guinea pig-IgG-Cy3                           | 706-165-148 | Jackson Immunoresearch                 |
| Anti-mouse-IgG-Cy3                                | 115-166-062 | Jackson Immunoresearch                 |
| Anti-rabbit-IgG-biotin                            | 111-065-003 | Jackson Immunoresearch                 |
| Anti-rabbit-IgG-Cy2                               | 111-225-003 | Jackson Immunoresearch                 |
| Anti-rat-Ig-biotin                                | BA-4001     | Vector Laboratories                    |
| Anti-goat-IgG-HRP                                 | P0449       | DAKO                                   |
| Streptavidin-PE                                   | 12-4317     | eBioscience                            |

**Supplementary Table S2: Primers used for RT-PCR**

| Gene          | Forward primer          | Reverse primer            |
|---------------|-------------------------|---------------------------|
| Human         |                         |                           |
| <i>Fst</i>    | cgatgaatgacaacacactcttc | ttttcccagggtccacagtc      |
| <i>Hprt</i>   | tgacactggcaaaacaatgca   | ggctcctttcaccagcaagct     |
| <i>Inhba</i>  | ggagaacgggtatgtggaga    | acaggctactgccttccttg      |
| Mouse         |                         |                           |
| <i>Acvr1</i>  | aagccggcctctggtgctct    | tgggggctggtgacgctctt      |
| <i>Acvr1b</i> | ctccaaagacaagacgctcc    | agcagcaataaagccaagga      |
| <i>Acvr1c</i> | tatcacactgcaccttccca    | accaagagaggcagaccaga      |
| <i>Acvr2a</i> | cgttcgtctttcttatc       | gccctcacagcaacaaaagt      |
| <i>Acvr2b</i> | actacaacgccaactgggag    | tggctcgtacgtgacttctg      |
| <i>Ang1</i>   | cattcttcgctgccattctg    | gcacattgcccattgtgaatc     |
| <i>Ang2</i>   | ttagcacaaggattcggacaat  | ttttgtgggtagtactgtccattca |
| <i>Ccl2</i>   | ttctgggcctgctgttcac     | gagccaacacgtggatgct       |
| <i>Ccl3</i>   | ctgctgctgcttctctaca     | caacgatgaattggcgtgg       |
| <i>Ccl4</i>   | tctctcctctgctcgtggc     | tggctgctgagaaccctgga      |
| <i>Csf2</i>   | tcattttggcctggtttt      | tattcgagcagggctacgg       |
| <i>Cxcl1</i>  | gcacccaaaccgaagtcata    | tggggacaccttttagcatc      |

|                                                                        |                               |                               |
|------------------------------------------------------------------------|-------------------------------|-------------------------------|
| <i>Cyp1a1</i>                                                          | tcgtggagcctcatgtacctggt       | aagcgcttgccagagtgccg          |
| <i>Cyp1b1</i>                                                          | cgcttcatcgcatggcc             | gcgaggaccacggtttccg           |
| <i>Gapdh</i>                                                           | tcgtggatctgacgtgccgctg        | caccaccctgttgctgtagccgtat     |
| <i>Gsta1_2</i> <sup>55</sup>                                           | cagagtccggaagatttga           | caaggcagtcttggttctc           |
| <i>Gstp1</i>                                                           | cctctgtctacgcagcactgaatcc     | ttccagctctggcctggtcag         |
| <i>Il15</i>                                                            | gaggtcaggaaagaatccacc         | atgccaggtaagagcttca           |
| <i>Il1b</i>                                                            | ggacagaatatcaaccaacaagtg      | tgctgatgtaccagttgggg          |
| <i>Il6</i>                                                             | ccggagaggagacttcacag          | ttctgcaagtgcacatcgt           |
| <i>Il7</i>                                                             | gcagaccatgttccatgtttc         | tggttcattattcgggcaat          |
| <i>Krt14</i>                                                           | aaccacgaggaggaaatgg           | ccggagctcagaaatctcac          |
| <i>Nqo1</i>                                                            | ctggccattcagagaagac           | gtctgcagctccagcttct           |
| <i>Rps29</i>                                                           | ggtcaccagcagcttactg           | gtccaacttaatgaagcctatgtcc     |
| <i>S100aA8</i>                                                         | gccgtctgaactggagaag           | gtgagatgccacaccacttt          |
| <i>S100aA9</i>                                                         | cgcagcataaccaccatcat          | aagatcaactttcggatcagc         |
| <i>Tcr<math>\gamma</math></i> (V $\gamma$ 3-C $\gamma$ ) <sup>56</sup> | gggtcgactcctggatatctcaggatcag | gggtcgactgtttcagcagaagaaggaag |
| <i>Tgfa</i>                                                            | ctgagtgactcaccctggc           | gcgagctgacagcagtggtat         |
| <i>Tgfb1</i>                                                           | agcccgaagcggactactat          | tccacatgttgctccacact          |
| <i>Tgfb2</i>                                                           | ttcgatctgggctgatttc           | gcaggataattgctgccttc          |
| <i>Tgfb3</i>                                                           | ctctgggttcagggtgtgt           | aacctggaggagaactgctg          |
| <i>Thbs1</i>                                                           | acaaacaggtgtgcaaaccgcg        | gcaggcatcgccaatcccgt          |
| <i>Thbs2</i>                                                           | tgagggctggtctccgtggg          | tccagcggccatcaattgggc         |
| <i>Tnfa</i>                                                            | gaccctcacactcagatcatcttct     | ccactggtggtttgctacga          |
| <i>Vegfa</i>                                                           | gtacctccaccatgccaagt          | ctgcatggatgtgtgctct           |

**Supplementary Table S3: Antibodies and staining reagents used for FACS analysis**

| <i>Name</i>               | <i>Clone</i> | <i>Source</i>  |
|---------------------------|--------------|----------------|
| $\gamma\delta$ TcR-FITC   | GL3          | BD Biosciences |
| $\gamma\delta$ TcR-biotin | GL3          | eBioscience    |
| CD11b-PE                  | M1/70        | eBiosciences   |
| CD3e-APC                  | 145-2C11     | BD Biosciences |
| CD45-APC                  | 30-F11       | eBiosciences   |

|                       |         |                |
|-----------------------|---------|----------------|
| F4/80-PE              | BM8     | Invitrogen     |
| Gr-1-FITC             | RB6-8C5 | eBiosciences   |
| Streptavidin-PE       | 12-4317 | eBioscience    |
| TCR $\beta$ -PE       | H57-597 | eBiosciences   |
| Thy1.2 (CD90.2)       | 53-2.1  | BD Biosciences |
| V $\gamma$ 3 TcR-FITC | 536     | BD Biosciences |

## **Supplementary Methods**

### **Genotyping of genetically modified mice**

Mice expressing the human activin  $\beta$ A subunit in keratinocytes under control of the keratin 14 (K14) promoter were genotyped by PCR using primers 5'-CCTCGGAGATCATCACGTTT-3' and 5'-CCCTTTAAGCCCACTTCCTC-3', which hybridize to the activin transgene and produce a 238 bp fragment. Mice expressing dnActRIB in keratinocytes were genotyped by PCR using primers 5'-TTCTTCCCCCTTGTTGTCCT-3' and 5'-AGGCAGTAGAAGGGCTTTCC-3', which hybridize to the dnActRIB transgene and give a product of 227 bp.

### **Keratinocyte culture and TGF- $\beta$ growth inhibition assay**

HaCaT keratinocytes<sup>57</sup> stably transfected with an activin- $\beta$ A expression vector ( $\beta$ A 10/4,  $\beta$ A 10/20 clones) and vector-transfected control clones (neo2, neo3)<sup>58</sup> were cultured in DMEM / 5% FCS supplemented with 400 $\mu$ g/ml G418.

For TGF- $\beta$  growth inhibition assay, cells were seeded in 96-well plates and cultured for 48h with various concentrations of human TGF- $\beta$ 1 (R&D Systems). BrdU (10 $\mu$ M) was added for the last 5 h of incubation and the amount of BrdU incorporated was analyzed using a colorimetric BrdU ELISA kit (Roche).

### **RNase protection assay**

RNase protection assays were carried out as described previously<sup>3</sup>. A 358 bp fragment corresponding to the 3'-end of the human *Inhba* cDNA and a 121 bp fragment corresponding to nucleotides 580-700 of the human *Gapdh* cDNA were used as templates.



## **Preparation of protein lysates and enzyme-linked immunosorbent assay (ELISA)**

Frozen skin samples were homogenized in lysis buffer containing 10mM Tris/HCl pH8, 1mM EDTA, 0.5mM EGTA, 140mM NaCl, 1% Triton-X100, 0.1% sodium deoxycholate, 0.1% SDS, 10µg/ml aprotinin, 50µg/ml leupeptin, 100µg/ml pepstatin, 0.5mM AEBSF, followed by sonication. IL-1 $\alpha$ , IL-1 $\beta$  and activin A levels in skin lysates or serum were determined using ELISA kits (R&D Systems).

## Supplementary References

55. Black, A.T. *et al.* Distinct effects of ultraviolet B light on antioxidant expression in undifferentiated and differentiated mouse keratinocytes. *Carcinogenesis* **29**, 219-225 (2008).
56. Kuhnlein, P. *et al.* The canonical T cell receptor of dendritic epidermal gamma delta T cells is highly conserved between rats and mice. *Eur J Immunol.* **26**, 3092-3097 (1996).
57. Boukamp, P. *et al.* Normal keratinization in a spontaneously immortalized aneuploid human keratinocyte cell line. *J Cell Biol.* **106**, 761-771 (1988).
58. Werner, S. *et al.* Targeted expression of a dominant-negative FGF receptor mutant in the epidermis of transgenic mice reveals a role of FGF in keratinocyte organization and differentiation. *EMBO J.* **12**, 2635-2643 (1993).
